# Supplementary material
Source: PubMed Central journal article supplement (PMC6204107)
Supplement: NIHMS1508906-supplement-3.pdf [file NIHMS1508906-supplement-3.pdf]

**Supplemental Figure 1:** A) Image of scaffolds taken from the EVOS microscope depicting slicing, hatching, and cylinder size with their respective change in distance and cylinder sizes from 2PP at 10% intensity and 15 ms using an EVOS RFP light cube. B) Control samples of PEGDMA without rhodamine B at 10% intensity and 15 ms, (no fluorescence detected). C) An example of the loss of fluorescence of a single scaffold over time (0-48 h). Full sets of scaffolds have a scale bar of 400  $\mu\text{m}$  (A, B), while single scaffolds have a scale bar of 200  $\mu\text{m}$  (C).

**Supplemental Figure 2:** Standard curve of rhodamine B concentrations loaded on PEGDMA printed 5mm discs. A standard curve was constructed from printed PEGDMA discs containing different concentrations of rhodamine B. n=3.

**Supplemental Table 1.** Goodness of fit measures for the release profiles shown in Figure 1 using five different mathematical drug release models. Fit line parameters for the most accurate model are also given.

| Model            | Equation                   |       | Rod Size ( $\mu\text{m}$ ) |       |       |
|------------------|----------------------------|-------|----------------------------|-------|-------|
|                  |                            |       | 5                          | 10    | 15    |
| Zero Order       | $Q = Q_0 + kt$             | $R^2$ | 0.604                      | 0.471 | 0.580 |
|                  |                            | Sy.x  | 9.54                       | 13.17 | 12.03 |
| First Order      | $Q = Q_0e^{-kt}$           | $R^2$ | 0.798                      | 0.928 | 0.869 |
|                  |                            | Sy.x  | 6.73                       | 4.52  | 6.27  |
| Higuchi          | $Q = k\sqrt{t}$            | $R^2$ | 0.456                      | 0.00  | 0.267 |
|                  |                            | Sy.x  | 10.55                      | 16.11 | 14.17 |
| Hixson-Crowell   | $Q^{1/3} = kt + Q_0^{1/3}$ | $R^2$ | 0.487                      | 0.429 | 0.524 |
|                  |                            | Sy.x  | 10.5                       | 12.4  | 11.7  |
| Korsmeyer-Peppas | $Q = kt^n$                 | $R^2$ | 0.790                      | 0.969 | 0.972 |
|                  |                            | Sy.x  | 6.70                       | 2.92  | 2.84  |
|                  |                            | k     | 13.6                       | 26.2  | 23.3  |
|                  |                            | n     | 0.220                      | 0.137 | 0.165 |

$Q$  is the relative amount of drug released over time,  $t$ ;  $k$  and  $n$  are release rate constant and exponent, respectively.

**Supplemental Table 2.** Goodness of fit measures for the release profiles shown in Figure 2 using five different mathematical drug release models. Fit line parameters for the most accurate model are also given.

| Model            | Equation                   |       | Spacing ( $\mu\text{m}$ ) |       |
|------------------|----------------------------|-------|---------------------------|-------|
|                  |                            |       | 5.00                      | 9.29  |
| Zero Order       | $Q = Q_0 + kt$             | $R^2$ | 0.834                     | 0.498 |
|                  |                            | Sy.x  | 6.06                      | 11.7  |
| First Order      | $Q = Q_0e^{-kt}$           | $R^2$ | 0.861                     | 0.921 |
|                  |                            | Sy.x  | 5.18                      | 4.37  |
| Higuchi          | $Q = k\sqrt{t}$            | $R^2$ | 0.885                     | 0.299 |
|                  |                            | Sy.x  | 4.50                      | 12.5  |
| Hixson-Crowell   | $Q^{1/3} = kt + Q_0^{1/3}$ | $R^2$ | 0.775                     | 0.437 |
|                  |                            | Sy.x  | 6.44                      | 11.4  |
| Korsmeyer-Peppas | $Q = kt^n$                 | $R^2$ | 0.935                     | 0.896 |
|                  |                            | Sy.x  | 3.47                      | 4.91  |
|                  |                            | k     | 6.44                      | 18.7  |
|                  |                            | n     | 0.352                     | 0.174 |

$Q$  is the relative amount of drug released over time,  $t$ ;  $k$  and  $n$  are release rate constant and exponent, respectively.

**Supplemental Table 3.** Goodness of fit measures for the release profiles shown in Figure 3 using five different mathematical drug release models. Fit line parameters for the most accurate model are also given.

| Model            | Equation                   |       | Slicing Distance ( $\mu\text{m}$ ) |       |       | Hatching Distance ( $\mu\text{m}$ ) |       |       |
|------------------|----------------------------|-------|------------------------------------|-------|-------|-------------------------------------|-------|-------|
|                  |                            |       | 0.05                               | 0.10  | 0.15  | 0.05                                | 0.10  | 0.15  |
| Zero Order       | $Q = Q_0 + kt$             | $R^2$ | 0.736                              | 0.715 | 0.666 | 0.737                               | 0.622 | 0.530 |
|                  |                            | Sy.x  | 8.50                               | 7.99  | 10.0  | 8.25                                | 9.81  | 13.7  |
| First Order      | $Q = Q_0e^{-kt}$           | $R^2$ | 0.943                              | 0.829 | 0.842 | 0.936                               | 0.902 | 0.939 |
|                  |                            | Sy.x  | 3.67                               | 5.85  | 6.49  | 3.82                                | 4.67  | 4.64  |
| Higuchi          | $Q = k\sqrt{t}$            | $R^2$ | 0.850                              | 0.581 | 0.550 | 0.840                               | 0.547 | 0.478 |
|                  |                            | Sy.x  | 5.71                               | 8.73  | 10.5  | 5.77                                | 9.60  | 12.9  |
| Hixson-Crowell   | $Q^{1/3} = kt + Q_0^{1/3}$ | $R^2$ | 0.850                              | 0.581 | 0.550 | 0.840                               | 0.547 | 0.479 |
|                  |                            | Sy.x  | 5.71                               | 8.73  | 10.5  | 5.77                                | 9.60  | 12.9  |
| Korsmeyer-Peppas | $Q = kt^n$                 | $R^2$ | 0.966                              | 0.960 | 0.960 | 0.952                               | 0.949 | 0.912 |
|                  |                            | Sy.x  | 2.79                               | 2.78  | 3.18  | 3.22                                | 3.28  | 5.44  |
|                  |                            | k     | 9.02                               | 14.4  | 17.0  | 8.73                                | 15.0  | 19.0  |
|                  |                            | n     | 0.309                              | 0.215 | 0.208 | 0.310                               | 0.212 | 0.205 |

$Q$  is the relative amount of drug released over time,  $t$ ;  $k$  and  $n$  are release rate constant and exponent, respectively.

**Supplemental Table 4.** Goodness of fit measures for the release profiles shown in Figure 4 using five different mathematical drug release models. Fit line parameters for the most accurate model are also given.

| Model       | Equation         |       | Slicing Distance ( $\mu\text{m}$ ) |       |       | Hatching Distance ( $\mu\text{m}$ ) |       |       |
|-------------|------------------|-------|------------------------------------|-------|-------|-------------------------------------|-------|-------|
|             |                  |       | 0.05                               | 0.10  | 0.15  | 0.05                                | 0.10  | 0.15  |
| Zero Order  | $Q = Q_0 + kt$   | $R^2$ | 0.616                              | 0.560 | 0.640 | 0.651                               | 0.662 | 0.734 |
|             |                  | Sy.x  | 11.1                               | 13.8  | 13.2  | 10.3                                | 11.5  | 10.1  |
| First Order | $Q = Q_0e^{-kt}$ | $R^2$ | 0.890                              | 0.907 | 0.823 | 0.870                               | 0.874 | 0.813 |

|                  |                            |                |       |       |       |       |       |       |
|------------------|----------------------------|----------------|-------|-------|-------|-------|-------|-------|
| Higuchi          | $Q = k\sqrt{t}$            | Sy.x           | 5.56  | 5.96  | 9.03  | 5.85  | 6.51  | 7.90  |
|                  |                            | R <sup>2</sup> | 0.494 | 0.386 | 0.575 | 0.464 | 0.512 | 0.627 |
|                  |                            | Sy.x           | 11.4  | 14.6  | 13.4  | 11.4  | 12.3  | 10.7  |
| Hixson-Crowell   | $Q^{1/3} = kt + Q_0^{1/3}$ | R <sup>2</sup> | 0.552 | 0.495 | 0.521 | 0.603 | 0.606 | 0.673 |
|                  |                            | Sy.x           | 11.0  | 13.5  | 14.5  | 10.0  | 11.3  | 10.2  |
|                  |                            | R <sup>2</sup> | 0.960 | 0.938 | 0.852 | 0.968 | 0.989 | 0.959 |
| Korsmeyer-Peppas | $Q = kt^n$                 | Sy.x           | 3.25  | 4.72  | 8.06  | 2.85  | 1.85  | 3.62  |
|                  |                            | k              | 18.3  | 22.8  | 17.9  | 18.7  | 20.6  | 17.6  |
|                  |                            | n              | 0.199 | 0.184 | 0.236 | 0.190 | 0.197 | 0.223 |
|                  |                            |                |       |       |       |       |       |       |

$Q$  is the relative amount of drug released over time,  $t$ ;  $k$  and  $n$  are release rate constant and exponent, respectively.
